# Supplementary material for: Pilot Study to Assess the Feasibility of a Mobile Unit for Remote Cognitive Screening of Isolated Elderly in Rural Areas
Source: MDPI journal article supplement (doi:10.3390/ijerph18116108), 2021-06-05
Supplement: s1 [file s1]

# French User Experience assessment

Notes:

Version A/B : First/Second assessment

Face to Face/Mobile Unit: If the User Experience assessment was completed after the Face-to-Face or the Mobile Unit condition.

1 – Face-to-face Version A.....P2

2 – Face-to-Face Version B..... P4

3 – Mobile Unit Version A.....P6

4 – Mobile Unit Version B.....P9

## Évaluation de l'expérience utilisateur

### Face à face - Version A (sans comparaison)

Questionnaire sur l'acceptation de la procédure à distance pour les tests cognitifs

Consigne : Merci de répondre à ce questionnaire. **Pour répondre, veuillez cocher la case correspondant à votre choix.**

1. Je suis globalement satisfait(e) de cette expérience.

Complètement en désaccord

Complètement d'accord

|   |   |   |   |   |   |   |
|---|---|---|---|---|---|---|
| 1 | 2 | 3 | 4 | 5 | 6 | 7 |
|---|---|---|---|---|---|---|

Commentaires :

---

---

---

2. Globalement, le système est facile à utiliser.

Complètement en désaccord

Complètement d'accord

|   |   |   |   |   |   |   |
|---|---|---|---|---|---|---|
| 1 | 2 | 3 | 4 | 5 | 6 | 7 |
|---|---|---|---|---|---|---|

Commentaires :

---

---

---

3. Les instructions étaient claires et compréhensibles.

Complètement en désaccord

Complètement d'accord

|   |   |   |   |   |   |   |
|---|---|---|---|---|---|---|
| 1 | 2 | 3 | 4 | 5 | 6 | 7 |
|---|---|---|---|---|---|---|

Commentaires :

---

---

---

4. Je répéterais cette expérience dans le futur.

Complètement en désaccord

Complètement d'accord

|   |   |   |   |   |   |   |
|---|---|---|---|---|---|---|
| 1 | 2 | 3 | 4 | 5 | 6 | 7 |
|---|---|---|---|---|---|---|

Commentaires :

---

---

---

5. Sur une échelle de 1 à 7, quelle est le degré de probabilité pour que vous recommandiez cette méthode d'évaluation à un ami ou un collègue ?

Complètement en désaccord

Complètement d'accord

|   |   |   |   |   |   |   |
|---|---|---|---|---|---|---|
| 1 | 2 | 3 | 4 | 5 | 6 | 7 |
|---|---|---|---|---|---|---|

Commentaires :

---

---

---

6. Sur une échelle de 1 à 7 : globalement, j'ai l'impression que mon niveau de stress pendant l'évaluation était...

Inférieur à d'habitude

Moyen

Supérieur à d'habitude

|   |   |   |   |   |   |   |
|---|---|---|---|---|---|---|
| 1 | 2 | 3 | 4 | 5 | 6 | 7 |
|---|---|---|---|---|---|---|

Commentaires :

---

---

---

7. Qu'est-ce qui manquait ou qui vous a déçu durant cette expérience ?

---

---

8. Qu'est-ce que vous avez le plus/le moins aimé dans cette procédure ?

---

---

9. Quelle(s) proposition(s) feriez-vous pour améliorer l'évaluation en face à face ?

---

---

## Évaluation de l'expérience utilisateur

### Face à face - Version B (avec comparaison)

Questionnaire sur l'acceptation de la procédure à distance pour les tests cognitifs

Consigne : Merci de répondre à ce questionnaire. **Pour répondre, veuillez cocher la case correspondant à votre choix.**

1. Je suis globalement satisfait(e) de cette expérience.

Complètement en désaccord

|   |   |   |   |   |   |   |
|---|---|---|---|---|---|---|
| 1 | 2 | 3 | 4 | 5 | 6 | 7 |
|---|---|---|---|---|---|---|

Complètement d'accord

Commentaires :

---

---

---

2. Globalement, le système est facile à utiliser.

Complètement en désaccord

|   |   |   |   |   |   |   |
|---|---|---|---|---|---|---|
| 1 | 2 | 3 | 4 | 5 | 6 | 7 |
|---|---|---|---|---|---|---|

Complètement d'accord

Commentaires :

---

---

---

3. Les instructions étaient claires et compréhensibles.

Complètement en désaccord

|   |   |   |   |   |   |   |
|---|---|---|---|---|---|---|
| 1 | 2 | 3 | 4 | 5 | 6 | 7 |
|---|---|---|---|---|---|---|

Complètement d'accord

Commentaires :

---

---

---

4. Je répéterais cette expérience dans le futur.

Complètement en désaccord

|   |   |   |   |   |   |   |
|---|---|---|---|---|---|---|
| 1 | 2 | 3 | 4 | 5 | 6 | 7 |
|---|---|---|---|---|---|---|

Complètement d'accord

Commentaires :

---

- 
- 
5. Sur une échelle de 1 à 7, quelle est le degré de probabilité pour que vous recommandiez cette méthode d'évaluation à un ami ou un collègue ?

Complètement en désaccord

Complètement d'accord

|   |   |   |   |   |   |   |
|---|---|---|---|---|---|---|
| 1 | 2 | 3 | 4 | 5 | 6 | 7 |
|---|---|---|---|---|---|---|

Commentaires :

---

---

---

6. Sur une échelle de 1 à 7 : globalement, j'ai l'impression que mon niveau de stress pendant l'évaluation était...

Inférieur à d'habitude

Moyen

Supérieur à d'habitude

|   |   |   |   |   |   |   |
|---|---|---|---|---|---|---|
| 1 | 2 | 3 | 4 | 5 | 6 | 7 |
|---|---|---|---|---|---|---|

Commentaires :

---

---

---

7. Quelle méthode d'évaluation préférez-vous, en face-à-face ou par vidéoconférence ?

|             |                 |
|-------------|-----------------|
| Face-à-face | Vidéoconférence |
|-------------|-----------------|

8. Qu'est-ce qui manquait ou qui vous a déçu durant cette expérience ?

---

---

9. Qu'est-ce que vous avez le plus/le moins aimé dans cette procédure ?

---

---

10. Quelle(s) proposition(s) feriez-vous pour améliorer l'évaluation en face à face ?

---

---

**Évaluation de l'expérience utilisateur**  
**Unité Mobile – Version A (sans comparaison)**

Questionnaire sur l'acceptation de la procédure à distance pour les tests cognitifs

Consigne : Merci de répondre à ce questionnaire. **Pour répondre, veuillez cocher la case correspondant à votre choix.**

1. Je suis globalement satisfait(e) de cette expérience.

Complètement en désaccord

Complètement d'accord

|   |   |   |   |   |   |   |
|---|---|---|---|---|---|---|
| 1 | 2 | 3 | 4 | 5 | 6 | 7 |
|---|---|---|---|---|---|---|

Commentaires :

---

---

---

2. Globalement, le système est facile à utiliser.

Complètement en désaccord

Complètement d'accord

|   |   |   |   |   |   |   |
|---|---|---|---|---|---|---|
| 1 | 2 | 3 | 4 | 5 | 6 | 7 |
|---|---|---|---|---|---|---|

Commentaires :

---

---

---

3. Les instructions étaient claires et compréhensibles.

Complètement en désaccord

Complètement d'accord

|   |   |   |   |   |   |   |
|---|---|---|---|---|---|---|
| 1 | 2 | 3 | 4 | 5 | 6 | 7 |
|---|---|---|---|---|---|---|

Commentaires :

---

---

---

4. Je répéterais cette expérience dans le futur.

Complètement en désaccord

Complètement d'accord

|   |   |   |   |   |   |   |
|---|---|---|---|---|---|---|
| 1 | 2 | 3 | 4 | 5 | 6 | 7 |
|---|---|---|---|---|---|---|

Commentaires :

---

---

---

- 
- 
5. Sur une échelle de 1 à 7, quelle est le degré de probabilité pour que vous recommandiez cette méthode d'évaluation à un ami ou un collègue ?

Complètement en désaccord

Complètement d'accord

|   |   |   |   |   |   |   |
|---|---|---|---|---|---|---|
| 1 | 2 | 3 | 4 | 5 | 6 | 7 |
|---|---|---|---|---|---|---|

Commentaires :

---

---

---

6. Sur une échelle de 1 à 7 : globalement, j'ai l'impression que mon niveau de stress pendant l'évaluation était...

Inférieur à d'habitude

Moyen

Supérieur à d'habitude

|   |   |   |   |   |   |   |
|---|---|---|---|---|---|---|
| 1 | 2 | 3 | 4 | 5 | 6 | 7 |
|---|---|---|---|---|---|---|

Commentaires :

---

---

---

7. L'unité mobile (la camionnette) était facile d'accès et confortable pour effectuer l'évaluation. [Veuillez motiver votre réponse dans la section des commentaires]

Complètement en désaccord

Complètement d'accord

|   |   |   |   |   |   |   |
|---|---|---|---|---|---|---|
| 1 | 2 | 3 | 4 | 5 | 6 | 7 |
|---|---|---|---|---|---|---|

Commentaires :

---

---

---

8. Sur une échelle de 1 à 7, quelle est la probabilité que vous souhaitiez vous engager dans de futures études en utilisant une unité mobile (camionnette) ?

Peu probable du tout

Indécis

Je participerais

|   |   |   |   |   |   |   |
|---|---|---|---|---|---|---|
| 1 | 2 | 3 | 4 | 5 | 6 | 7 |
|---|---|---|---|---|---|---|

Commentaires :

---

---

---

9. Qu'est-ce qui manquait ou qui vous a déçu durant cette expérience ?

---

---

10. Qu'est-ce que vous avez le plus/le moins aimé dans cette procédure ?

---

---

11. Quelle(s) proposition(s) feriez-vous pour améliorer l'évaluation en vidéoconférence ?

---

---



**Évaluation de l'expérience utilisateur**  
**Unité Mobile – Version B (avec comparaison)**

Questionnaire sur l'acceptation de la procédure à distance pour les tests cognitifs

**Consigne** : Merci de répondre à ce questionnaire. **Pour répondre, veuillez cocher la case correspondant à votre choix.**

1. Je suis globalement satisfait(e) de cette expérience.

Complètement en désaccord

Complètement d'accord

|   |   |   |   |   |   |   |
|---|---|---|---|---|---|---|
| 1 | 2 | 3 | 4 | 5 | 6 | 7 |
|---|---|---|---|---|---|---|

Commentaires :

---

---

---

2. Globalement, le système est facile à utiliser.

Complètement en désaccord

Complètement d'accord

|   |   |   |   |   |   |   |
|---|---|---|---|---|---|---|
| 1 | 2 | 3 | 4 | 5 | 6 | 7 |
|---|---|---|---|---|---|---|

Commentaires :

---

---

---

3. Les instructions étaient claires et compréhensibles.

Complètement en désaccord

Complètement d'accord

|   |   |   |   |   |   |   |
|---|---|---|---|---|---|---|
| 1 | 2 | 3 | 4 | 5 | 6 | 7 |
|---|---|---|---|---|---|---|

Commentaires :

---

---

---

4. Je répéterais cette expérience dans le futur.

Complètement en désaccord

Complètement d'accord

|   |   |   |   |   |   |   |
|---|---|---|---|---|---|---|
| 1 | 2 | 3 | 4 | 5 | 6 | 7 |
|---|---|---|---|---|---|---|

Commentaires :

---

---

---

5. Sur une échelle de 1 à 7, quelle est le degré de probabilité pour que vous recommandiez cette méthode d'évaluation à un ami ou un collègue ?

Complètement en désaccord

Complètement d'accord

|   |   |   |   |   |   |   |
|---|---|---|---|---|---|---|
| 1 | 2 | 3 | 4 | 5 | 6 | 7 |
|---|---|---|---|---|---|---|

Commentaires :

---

---

---

6. Sur une échelle de 1 à 7 : globalement, j'ai l'impression que mon niveau de stress pendant l'évaluation était...

Inférieur à d'habitude

Moyen

Supérieur à d'habitude

|   |   |   |   |   |   |   |
|---|---|---|---|---|---|---|
| 1 | 2 | 3 | 4 | 5 | 6 | 7 |
|---|---|---|---|---|---|---|

Commentaires :

---

---

---

7. L'unité mobile (la camionnette) était facile d'accès et confortable pour effectuer l'évaluation. [Veuillez motiver votre réponse dans la section des commentaires]

Complètement en désaccord

Complètement d'accord

|   |   |   |   |   |   |   |
|---|---|---|---|---|---|---|
| 1 | 2 | 3 | 4 | 5 | 6 | 7 |
|---|---|---|---|---|---|---|

Commentaires :

---

---

---

8. Sur une échelle de 1 à 7, quelle est la probabilité pour **que vous souhaitiez vous** engager dans de futures études en utilisant une unité mobile (camionnette) ?

Peu probable

Indécis

Je participerais

|   |   |   |   |   |   |   |
|---|---|---|---|---|---|---|
| 1 | 2 | 3 | 4 | 5 | 6 | 7 |
|---|---|---|---|---|---|---|

Commentaires :

---

---

---

9. Quelle méthode d'évaluation préférez-vous, en face-à-face ou par vidéoconférence ?

|                    |                        |
|--------------------|------------------------|
| <b>Face-à-face</b> | <b>Vidéoconférence</b> |
|--------------------|------------------------|

10. Qu'est-ce qui manquait ou qui vous a déçu durant cette expérience ?

---

---

11. Qu'est-ce que vous avez le plus/le moins aimé dans cette procédure ?

---

---

12. Quelle(s) proposition(s) feriez-vous pour améliorer l'évaluation en vidéoconférence ?

---

---
